# Supplementary material for: Pressure ulcers microbiota dynamics and wound evolution
Source: PubMed Central journal article supplement (PMC8445962; doi:10.1038/s41598-021-98073-x), 2021-09-16
Supplement: 41598_2021_98073_MOESM2_ESM.pdf [file 41598_2021_98073_MOESM2_ESM.pdf]

| Id             | Gender | Age | Body Mass Index (kg/m <sup>2</sup> ) | Weight (D0) | Weight (D28) | Weight change (%) | Undernutrition Score | CRP (D0) | CRP (D28) | Wound stage (D0) | Wound stage (D28) | Wound localisation | Area of wound (D0) | Area of wound (D28) | Area of wound (% reduction) | Depth of wound (D0) | Depth of wound (D28) | Depth of wound (% reduction) | Duration of wound (D0) | Detachment (D0) | Detachment (D28) | Amount of exudate (D0) | Initial treatment | Antibiotherapy | Clinical evolution of wound at D28 | Nb of reads (D0) | Nb DNA 16S reads assembled at 97% similarity (D0) | Percentage of rDNA 16S reads assembled at 97% similarity (D0) | Nb of reads (D28) | Nb rDNA 16S reads assembled at 97% similarity (D28) | Percentage of rDNA 16S reads assembled at 97% similarity (D28) |
|----------------|--------|-----|--------------------------------------|-------------|--------------|-------------------|----------------------|----------|-----------|------------------|-------------------|--------------------|--------------------|---------------------|-----------------------------|---------------------|----------------------|------------------------------|------------------------|-----------------|------------------|------------------------|-------------------|----------------|------------------------------------|------------------|---------------------------------------------------|---------------------------------------------------------------|-------------------|-----------------------------------------------------|----------------------------------------------------------------|
| <b>C01P001</b> | Female | 56  | 33.7                                 | 93          | 94           | 1.08              | Moderate             | 16       | 20        | 4                | 4                 | Sacral             | 879.2              | 376.8               | -57.14                      | 20                  | 10                   | -50.00                       | 269                    | Yes             | Yes              | 3                      | Yes               | No             | Improved                           | 57812            | 48609                                             | 84.08%                                                        | 59918             | 52413                                               | 87.47%                                                         |
| <b>C01P003</b> | Male   | 62  | 17.5                                 | 53          | 58           | 9.43              | Severe               | 17       | 8         | 3                | 4                 | Ischial            | 392.5              | 451.375             | 15.00                       | 10                  | 15                   | 50.00                        | 32                     | Yes             | Yes              | 2                      | Yes               | No             | Worsened                           | 48660            | 39779                                             | 81.75%                                                        | 50438             | 43412                                               | 86.07%                                                         |
| <b>C01P004</b> | Male   | 67  | 24.2                                 | 66          | 64           | -3.03             | None                 | 22       | 26        | 3                | 3                 | Sacral             | 29437.5            | 31460               | 6.67                        | 150                 | 150                  | 0.00                         | 2083                   | No              | No               | 2                      | No                | No             | Stagnated                          | 46043            | 27255                                             | 59.19%                                                        | 49731             | 41440                                               | 83.33%                                                         |
| <b>C01P005</b> | Female | 76  | 24.8                                 | 58          | 57           | -1.72             | Moderate             | 26       | 23        | 3                | 2                 | Sacral             | 2041               | 206.5               | -65.38                      | 4                   | 2                    | -50.00                       | 927                    | No              | No               | 4                      | No                | Yes            | Improved                           | 59008            | 46974                                             | 82.54%                                                        | 44315             | 37976                                               | 85.70%                                                         |
| <b>C01P007</b> | Male   | 52  | 24.5                                 | 75          | 75           | 0.00              | None                 | 9        | 22        | 3                | 3                 | Sacral             | 628                | 506.325             | -19.38                      | 3                   | 5                    | 66.67                        | 54                     | No              | No               | 2                      | Yes               | No             | Stagnated                          | 12281            | 10194                                             | 83.01%                                                        | 50161             | 43625                                               | 86.97%                                                         |
| <b>C01P008</b> | Female | 83  | 27.2                                 | 74          | 74           | 0.00              | None                 | 3        | 4         | 3                | 3                 | Ischial            | 196.25             | 172.7               | -12.00                      | 15                  | 22                   | 46.67                        | 183                    | No              | No               | 3                      | No                | No             | Worsened                           | 52602            | 44003                                             | 83.65%                                                        | 52612             | 39553                                               | 75.18%                                                         |
| <b>C01P013</b> | Male   | 54  | 27.2                                 | 97          | 97           | 0.00              | Moderate             | 67       | 14        | 3                | 3                 | Trochanteric       | 1511.125           | 989.1               | -34.55                      | 5                   | 0                    | -100.00                      | 445                    | No              | No               | 3                      | No                | No             | Stagnated                          | 50848            | 34212                                             | 67.28%                                                        | 10444             | 6221                                                | 59.57%                                                         |
| <b>C01P014</b> | Male   | 31  | 37.9                                 | 118         | 116          | 0.00              | None                 | 6        | 7         | 4                | 4                 | Sacral             | 314                | 235.5               | -25.00                      | 30                  | 40                   | 33.33                        | 1063                   | Yes             | Yes              | 2                      | No                | No             | Worsened                           | 48459            | 43633                                             | 90.04%                                                        | 52081             | 46685                                               | 89.64%                                                         |
| <b>C01P015</b> | Female | 56  | 17.7                                 | 53          | 54           | 1.89              | Moderate             | 35       | 39        | 4                | 4                 | Ischial            | 414.48             | 102.05              | -75.38                      | 60                  | 40                   | -33.33                       | 190                    | Yes             | Yes              | 3                      | Yes               | No             | Improved                           | 49119            | 35246                                             | 71.76%                                                        | 38032             | 32938                                               | 86.61%                                                         |
| <b>C01P016</b> | Female | 68  | 30.1                                 | 82          | 82           | 0.00              | Severe               | 7        | 4         | 3                | 3                 | Sacral             | 4906.25            | 2669                | -45.60                      | 27                  | 10                   | -62.96                       | 191                    | Yes             | Yes              | 2                      | No                | No             | Improved                           | 48850            | 37791                                             | 77.36%                                                        | 45988             | 40311                                               | 87.81%                                                         |
| <b>C01P020</b> | Female | 66  | 25.0                                 | 64          | 63           | -1.56             | Moderate             | 6        | 5         | 4                | 4                 | Sacral             | 294.375            | 176.625             | -40.00                      | 25                  | 10                   | -60.00                       | 207                    | Yes             | Yes              | 2                      | Yes               | No             | Improved                           | 56249            | 43614                                             | 77.54%                                                        | 41122             | 31851                                               | 77.45%                                                         |
| <b>C01P029</b> | Male   | 49  | 31.7                                 | 111         | 111          | 0.00              | Severe               | 11       | 1         | 3                | 3                 | Ischial            | 266.9              | 282.6               | 5.88                        | 3                   | 1                    | -66.67                       | 195                    | No              | No               | 2                      | No                | No             | Stagnated                          | 56412            | 44962                                             | 79.70%                                                        | 5954              | 44807                                               | 81.57%                                                         |
| <b>C01P030</b> | Female | 89  | 30.4                                 | 74          | 73           | -1.35             | Severe               | 163      | 82        | 3                | 3                 | Sacral             | 2362.85            | 1413                | -40.20                      | 50                  | 4                    | -92.00                       | 154                    | Yes             | Yes              | 4                      | Yes               | No             | Improved                           | 49756            | 40045                                             | 80.48%                                                        | 43760             | 37982                                               | 86.80%                                                         |
| <b>C01P031</b> | Male   | 65  | 29.4                                 | 89          | 93           | 4.43              | None                 | 13       | 13        | 3                | 3                 | Ischial            | 1894               | 1000.875            | -46.88                      | 0                   | 0                    | 0.00                         | 4358                   | No              | No               | 4                      | Yes               | No             | Improved                           | 45567            | 41496                                             | 91.73%                                                        | 45400             | 39445                                               | 86.88%                                                         |
| <b>C01P036</b> | Female | 75  | 23.2                                 | 61          | 61           | 0.00              | Severe               | 58       | 6         | 3                | 3                 | Sacral             | 3532.5             | 1632.8              | -53.78                      | 45                  | 37                   | -17.78                       | 52                     | No              | Yes              | 3                      | Yes               | Yes            | Improved                           | 59502            | 48046                                             | 80.75%                                                        | 49585             | 42347                                               | 85.40%                                                         |
| <b>C01P037</b> | Male   | 66  | 29.8                                 | 83          | 82           | -1.20             | Severe               | 154      | 69        | 3                | 3                 | Ischial            | 381.51             | 440.385             | 15.43                       | 45                  | 44                   | -2.22                        | 150                    | No              | Yes              | 4                      | Yes               | Yes            | Stagnated                          | 59577            | 43832                                             | 73.57%                                                        | 51766             | 33367                                               | 64.46%                                                         |
| <b>C01P038</b> | Male   | 58  | 25.2                                 | 80          | 80           | 0.00              | None                 | 2        | 1         | 4                | 3                 | Ischial            | 133.45             | 157                 | 17.65                       | 18                  | 20                   | 11.11                        | 50                     | Yes             | Yes              | 3                      | Yes               | No             | Improved                           | 49272            | 41624                                             | 84.48%                                                        | 50670             | 43609                                               | 86.06%                                                         |
| <b>C01P040</b> | Male   | 47  | 21.9                                 | 75          | 64           | -14.67            | Severe               | 13       | 0         | 4                | 4                 | Ischial            | 0.285              | 11.778              | 1400.00                     | 2                   | 10                   | 400.00                       | 20                     | Yes             | Yes              | 3                      | No                | No             | Stagnated                          | 56253            | 44669                                             | 83.02%                                                        | 39894             | 31198                                               | 83.22%                                                         |
| <b>C01P041</b> | Male   | 61  | 25.4                                 | 75          | 75           | 0.00              | None                 | 11       | 10        | 3                | 3                 | Sacral             | 753.6              | 518.1               | -31.25                      | 2                   | 9                    | 350.00                       | 794                    | Yes             | No               | 2                      | No                | No             | Improved                           | 45748            | 39028                                             | 85.31%                                                        | 47247             | 40837                                               | 86.43%                                                         |
| <b>C01P043</b> | Female | 67  | 18.7                                 | 45          | 45           | 0.00              | Moderate             | 4        | 4         | 3                | 2                 | Sacral             | 106.76             | 23.55               | -77.94                      | 0                   | 4                    | 100.00                       | 61                     | No              | No               | 2                      | Yes               | Yes            | Improved                           | 44482            | 26467                                             | 59.50%                                                        | 41157             | 26464                                               | 64.30%                                                         |
| <b>C01P046</b> | Male   | 57  | 28.7                                 | 88          | 94           | 6.82              | None                 | 24       | 23        | 3                | 3                 | Ischial            | 2.355              | 180.55              | 7566.67                     | 0                   | 2                    | 100.00                       | 82                     | No              | No               | 3                      | Yes               | No             | Improved                           | 58967            | 48273                                             | 81.86%                                                        | 42037             | 34394                                               | 81.82%                                                         |
| <b>C01P047</b> | Male   | 47  | 22.0                                 | 72          | 71           | -1.39             | Severe               | 75       | 21        | 4                | 4                 | Ischial            | 4239               | 5459.675            | 28.80                       | 3                   | 0                    | -100.00                      | 126                    | Yes             | Yes              | 4                      | No                | No             | Improved                           | 50710            | 38121                                             | 75.17%                                                        | 42402             | 24765                                               | 58.41%                                                         |
| <b>C01P048</b> | Male   | 61  | 27.4                                 | 83          | 86           | 3.61              | Severe               | 62       | 24        | 3                | 3                 | Ischial            | 2755.35            | 8647.56             | 213.85                      | 17                  | 10                   | -41.18                       | 195                    | Yes             | No               | 4                      | No                | Yes            | Improved                           | 47940            | 29052                                             | 60.60%                                                        | 49170             | 31567                                               | 64.20%                                                         |
| <b>C01P049</b> | Male   | 64  | 25.1                                 | 87          | 88           | 1.15              | None                 | 22       | 28        | 4                | 3                 | Ischial            | 1117.75            | 153.075             | 30.00                       | 20                  | 12                   | -40.00                       | 637                    | Yes             | Yes              | 3                      | No                | No             | Improved                           | 48650            | 39980                                             | 82.19%                                                        | 46955             | 36940                                               | 78.67%                                                         |
