# Supplementary material for: Pressure ulcers microbiota dynamics and wound evolution
Source: PubMed Central journal article supplement (PMC8445962; doi:10.1038/s41598-021-98073-x), 2021-09-16
Supplement: 41598_2021_98073_MOESM4_ESM.pdf [file 41598_2021_98073_MOESM4_ESM.pdf]

| Accession    | Sample Name  | Isolate                       |
|--------------|--------------|-------------------------------|
| SAMN20338432 | C01P01_J0_R1 | chronic pressure ulcer wounds |
| SAMN20338433 | C01P01_J0_R2 | chronic pressure ulcer wounds |
| SAMN20338434 | C01P03_J0_R1 | chronic pressure ulcer wounds |
| SAMN20338435 | C01P03_J0_R2 | chronic pressure ulcer wounds |
| SAMN20338436 | C01P04_J0_R1 | chronic pressure ulcer wounds |
| SAMN20338437 | C01P04_J0_R2 | chronic pressure ulcer wounds |
| SAMN20338438 | C01P05_J0_R1 | chronic pressure ulcer wounds |
| SAMN20338439 | C01P05_J0_R2 | chronic pressure ulcer wounds |
| SAMN20338440 | C01P07_J0_R1 | chronic pressure ulcer wounds |
| SAMN20338441 | C01P07_J0_R2 | chronic pressure ulcer wounds |
| SAMN20338442 | C01P08_J0_R1 | chronic pressure ulcer wounds |
| SAMN20338443 | C01P08_J0_R2 | chronic pressure ulcer wounds |
| SAMN20338444 | C01P13_J0_R1 | chronic pressure ulcer wounds |
| SAMN20338445 | C01P13_J0_R2 | chronic pressure ulcer wounds |
| SAMN20338446 | C01P14_J0_R1 | chronic pressure ulcer wounds |
| SAMN20338447 | C01P14_J0_R2 | chronic pressure ulcer wounds |
| SAMN20338448 | C01P15_J0_R1 | chronic pressure ulcer wounds |
| SAMN20338449 | C01P15_J0_R2 | chronic pressure ulcer wounds |
| SAMN20338450 | C01P16_J0_R1 | chronic pressure ulcer wounds |
| SAMN20338451 | C01P16_J0_R2 | chronic pressure ulcer wounds |
| SAMN20338452 | C01P20_J0_R1 | chronic pressure ulcer wounds |
| SAMN20338453 | C01P20_J0_R2 | chronic pressure ulcer wounds |
| SAMN20338454 | C01P29_J0_R1 | chronic pressure ulcer wounds |
| SAMN20338455 | C01P29_J0_R2 | chronic pressure ulcer wounds |
| SAMN20338456 | C01P30_J0_R1 | chronic pressure ulcer wounds |
| SAMN20338457 | C01P30_J0_R2 | chronic pressure ulcer wounds |
| SAMN20338458 | C01P31_J0_R1 | chronic pressure ulcer wounds |
| SAMN20338459 | C01P31_J0_R2 | chronic pressure ulcer wounds |
| SAMN20338460 | C01P36_J0_R1 | chronic pressure ulcer wounds |
| SAMN20338461 | C01P36_J0_R2 | chronic pressure ulcer wounds |
| SAMN20338462 | C01P37_J0_R1 | chronic pressure ulcer wounds |
| SAMN20338463 | C01P37_J0_R2 | chronic pressure ulcer wounds |
| SAMN20338464 | C01P38_J0_R1 | chronic pressure ulcer wounds |
| SAMN20338465 | C01P38_J0_R2 | chronic pressure ulcer wounds |
| SAMN20338466 | C01P40_J0_R1 | chronic pressure ulcer wounds |
| SAMN20338467 | C01P40_J0_R2 | chronic pressure ulcer wounds |
| SAMN20338468 | C01P41_J0_R1 | chronic pressure ulcer wounds |
| SAMN20338469 | C01P41_J0_R2 | chronic pressure ulcer wounds |
| SAMN20338470 | C01P43_J0_R1 | chronic pressure ulcer wounds |
| SAMN20338471 | C01P43_J0_R2 | chronic pressure ulcer wounds |
| SAMN20338472 | C01P46_J0_R1 | chronic pressure ulcer wounds |
| SAMN20338473 | C01P46_J0_R2 | chronic pressure ulcer wounds |
| SAMN20338474 | C01P47_J0_R1 | chronic pressure ulcer wounds |
| SAMN20338475 | C01P47_J0_R2 | chronic pressure ulcer wounds |
| SAMN20338476 | C01P48_J0_R1 | chronic pressure ulcer wounds |
| SAMN20338477 | C01P48_J0_R2 | chronic pressure ulcer wounds |
| SAMN20338478 | C01P49_J0_R1 | chronic pressure ulcer wounds |

|              |               |                               |
|--------------|---------------|-------------------------------|
| SAMN20338479 | C01P49_J0_R2  | chronic pressure ulcer wounds |
| SAMN20338480 | C01P01_J28_R1 | chronic pressure ulcer wounds |
| SAMN20338481 | C01P01_J28_R2 | chronic pressure ulcer wounds |
| SAMN20338482 | C01P03_J28_R1 | chronic pressure ulcer wounds |
| SAMN20338483 | C01P03_J28_R2 | chronic pressure ulcer wounds |
| SAMN20338484 | C01P04_J28_R1 | chronic pressure ulcer wounds |
| SAMN20338485 | C01P04_J28_R2 | chronic pressure ulcer wounds |
| SAMN20338486 | C01P05_J28_R1 | chronic pressure ulcer wounds |
| SAMN20338487 | C01P05_J28_R2 | chronic pressure ulcer wounds |
| SAMN20338488 | C01P07_J28_R1 | chronic pressure ulcer wounds |
| SAMN20338489 | C01P07_J28_R2 | chronic pressure ulcer wounds |
| SAMN20338490 | C01P08_J28_R1 | chronic pressure ulcer wounds |
| SAMN20338491 | C01P08_J28_R2 | chronic pressure ulcer wounds |
| SAMN20338492 | C01P13_J28_R1 | chronic pressure ulcer wounds |
| SAMN20338493 | C01P13_J28_R2 | chronic pressure ulcer wounds |
| SAMN20338494 | C01P14_J28_R1 | chronic pressure ulcer wounds |
| SAMN20338495 | C01P14_J28_R2 | chronic pressure ulcer wounds |
| SAMN20338496 | C01P15_J28_R1 | chronic pressure ulcer wounds |
| SAMN20338497 | C01P15_J28_R2 | chronic pressure ulcer wounds |
| SAMN20338498 | C01P16_J28_R1 | chronic pressure ulcer wounds |
| SAMN20338499 | C01P16_J28_R2 | chronic pressure ulcer wounds |
| SAMN20338500 | C01P20_J28_R1 | chronic pressure ulcer wounds |
| SAMN20338501 | C01P20_J28_R2 | chronic pressure ulcer wounds |
| SAMN20338502 | C01P29_J28_R1 | chronic pressure ulcer wounds |
| SAMN20338503 | C01P29_J28_R2 | chronic pressure ulcer wounds |
| SAMN20338504 | C01P30_J28_R1 | chronic pressure ulcer wounds |
| SAMN20338505 | C01P30_J28_R2 | chronic pressure ulcer wounds |
| SAMN20338506 | C01P31_J28_R1 | chronic pressure ulcer wounds |
| SAMN20338507 | C01P31_J28_R2 | chronic pressure ulcer wounds |
| SAMN20338508 | C01P36_J28_R1 | chronic pressure ulcer wounds |
| SAMN20338509 | C01P36_J28_R2 | chronic pressure ulcer wounds |
| SAMN20338510 | C01P37_J28_R1 | chronic pressure ulcer wounds |
| SAMN20338511 | C01P37_J28_R2 | chronic pressure ulcer wounds |
| SAMN20338512 | C01P38_J28_R1 | chronic pressure ulcer wounds |
| SAMN20338513 | C01P38_J28_R2 | chronic pressure ulcer wounds |
| SAMN20338514 | C01P40_J28_R1 | chronic pressure ulcer wounds |
| SAMN20338515 | C01P40_J28_R2 | chronic pressure ulcer wounds |
| SAMN20338516 | C01P41_J28_R1 | chronic pressure ulcer wounds |
| SAMN20338517 | C01P41_J28_R2 | chronic pressure ulcer wounds |
| SAMN20338518 | C01P43_J28_R1 | chronic pressure ulcer wounds |
| SAMN20338519 | C01P43_J28_R2 | chronic pressure ulcer wounds |
| SAMN20338520 | C01P46_J28_R1 | chronic pressure ulcer wounds |
| SAMN20338521 | C01P46_J28_R2 | chronic pressure ulcer wounds |
| SAMN20338522 | C01P47_J28_R1 | chronic pressure ulcer wounds |
| SAMN20338523 | C01P47_J28_R2 | chronic pressure ulcer wounds |
| SAMN20338524 | C01P48_J28_R1 | chronic pressure ulcer wounds |
| SAMN20338525 | C01P48_J28_R2 | chronic pressure ulcer wounds |
| SAMN20338526 | C01P49_J28_R1 | chronic pressure ulcer wounds |

SAMN20338527

C01P49\_J28\_R2

chronic pressure ulcer wounds
